# Supplementary material for: Three-in-one: achieving a robust and effective hydrogen-evolving hybrid material by integrating polyoxometalate, a photo-responsive metal–organic framework, and in situ generated Pt nanoparticles
Source: Royal Society of Chemistry journal article supplement (doi:10.1039/d1ta02792a), 2021-01-01
Supplement: d1ta02792a1.pdf [file d1ta02792a1.pdf]

## SUPPORTING INFORMATION

### **Three-in-One: Achieving Robust and Effective Hydrogen-Evolving Hybrid Materials by Integrating Polyoxometalate, Photo-responsive Metal-Organic Framework, and in-situ Generated Pt nanoparticles**

Le Jiao, Yuanyuan Dong, Xing Xin, Ruijie Wang, Hongjin Lv\*

MOE Key Laboratory of Cluster Science, School of Chemistry and Chemical Engineering, Beijing Institute of Technology, Beijing 102488, P. R. China.

Corresponding email: [hlv@bit.edu.cn](mailto:hlv@bit.edu.cn)

#### **Table of content**

##### **1. Figure S1-S16**

|                                                                                                                                                             |    |
|-------------------------------------------------------------------------------------------------------------------------------------------------------------|----|
| <b>Figure S1.</b> SEM image of NU-1000. ....                                                                                                                | S3 |
| <b>Figure S2.</b> PXRD patterns of $P_2W_{18}$ , $0.34-P_2W_{18}@NU-1000$ and NU-1000. ....                                                                 | S3 |
| <b>Figure S3.</b> EDS elemental analysis of NU-1000. ....                                                                                                   | S4 |
| <b>Figure S4.</b> Photocatalytic hydrogen evolution at different pH values. ....                                                                            | S4 |
| <b>Figure S5.</b> TEM image of NU-1000-Pt. ....                                                                                                             | S5 |
| <b>Figure S6.</b> XPS of Pt in NU-1000-Pt. ....                                                                                                             | S5 |
| <b>Figure S7.</b> EDS elemental analysis of $0.34-P_2W_{18}@NU-1000-Pt$ . ....                                                                              | S6 |
| <b>Figure S8.</b> The corresponding elemental mapping images of $0.34-P_2W_{18}@NU-1000-Pt$ . ....                                                          | S6 |
| <b>Figure S9.</b> The comparison of low temperature $N_2$ adsorption-desorption isotherms of $0.34-P_2W_{18}@NU-1000$ before and after photocatalysis. .... | S7 |
| <b>Figure S10.</b> The comparison of the pore distribution curves of $0.34-P_2W_{18}@NU-1000$ before and after photocatalysis. ....                         | S7 |
| <b>Figure S11.</b> Photocatalytic hydrogen evolution of $0.34-P_2W_{18}@NU-1000$ with different types of Pt sources. ....                                   | S8 |

|                                                                                                                                              |     |
|----------------------------------------------------------------------------------------------------------------------------------------------|-----|
| <b>Figure S12.</b> SEM image of 0.34- $\text{P}_2\text{W}_{18}$ @NU-1000 after photocatalytic hydrogen evolution. ....                       | S8  |
| <b>Figure S13.</b> PXRD patterns of 0.34- $\text{P}_2\text{W}_{18}$ @NU-1000 before and after photocatalytic reaction. ....                  | S9  |
| <b>Figure S14.</b> FT-IR spectra of 0.34- $\text{P}_2\text{W}_{18}$ @NU-1000 before and after photocatalysis. ....                           | S9  |
| <b>Figure S15.</b> Photocatalytic hydrogen under different light sources. ....                                                               | S10 |
| <b>Figure S16.</b> Photocatalytic hydrogen evolution of 0.34- $\text{P}_2\text{W}_{18}$ @NU-1000 under Natural Sunlight. ....                | S10 |
| <b>Figure S17.</b> Cyclic voltammogram of $\text{P}_2\text{W}_{18}$ ( $10^{-4}$ M) in 0.1 M $\text{H}_2\text{SO}_4$ aqueous solution. ....   | S11 |
| <br>                                                                                                                                         |     |
| <b>2. Table S1-S2</b>                                                                                                                        |     |
| <b>Table S1.</b> Comparison of different photocatalytic systems for hydrogen production. ....                                                | S11 |
| <b>Table S2.</b> PL decay (at 505 nm) lifetimes of NU-1000, 0.34- $\text{P}_2\text{W}_{18}$ @NU-1000 samples upon excitation at 365 nm. .... | S11 |
| <br>                                                                                                                                         |     |
| <b>3. Apparent quantum yield calculation</b> .....                                                                                           | S12 |
| <br>                                                                                                                                         |     |
| <b>4. References</b> .....                                                                                                                   | S12 |

## 1. Figure S1-S17

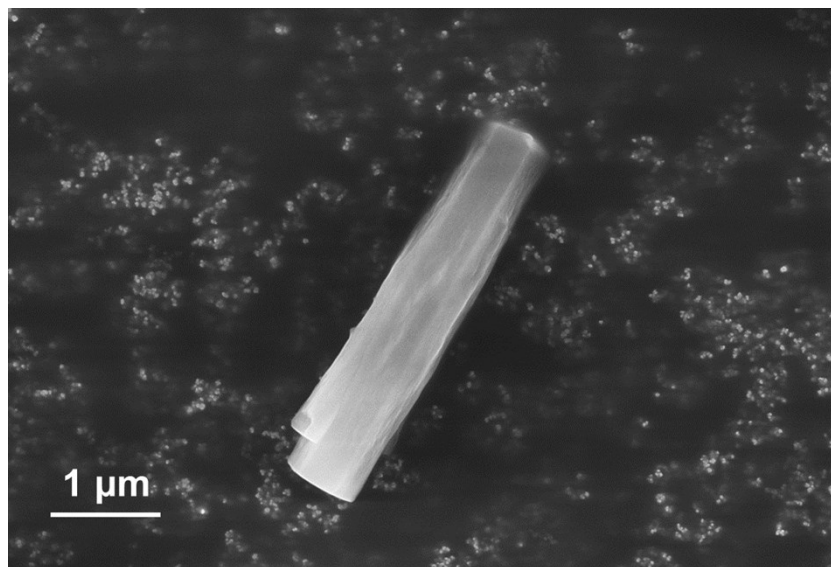

Figure S1. SEM image of NU-1000.

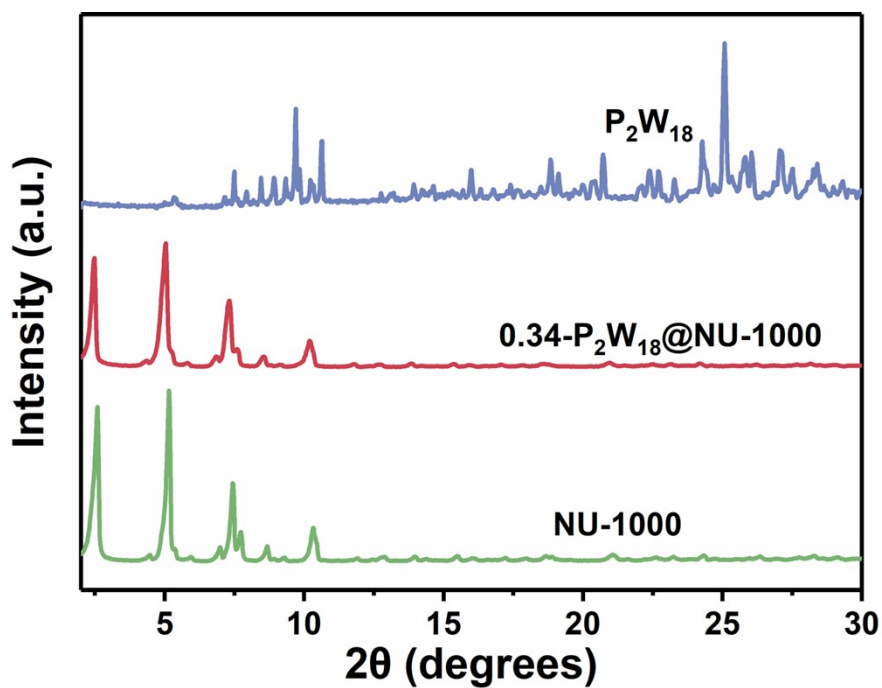

Figure S2. PXRD patterns of P<sub>2</sub>W<sub>18</sub>, 0.34-P<sub>2</sub>W<sub>18</sub>@NU-1000 and NU-1000.

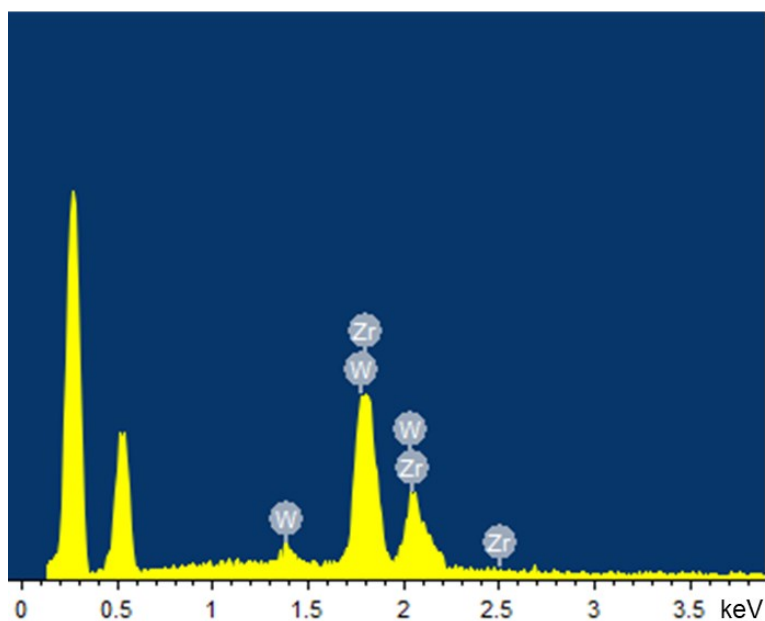

Figure S3. EDS elemental analysis of 0.34- $P_2W_{18}@NU-1000$ .

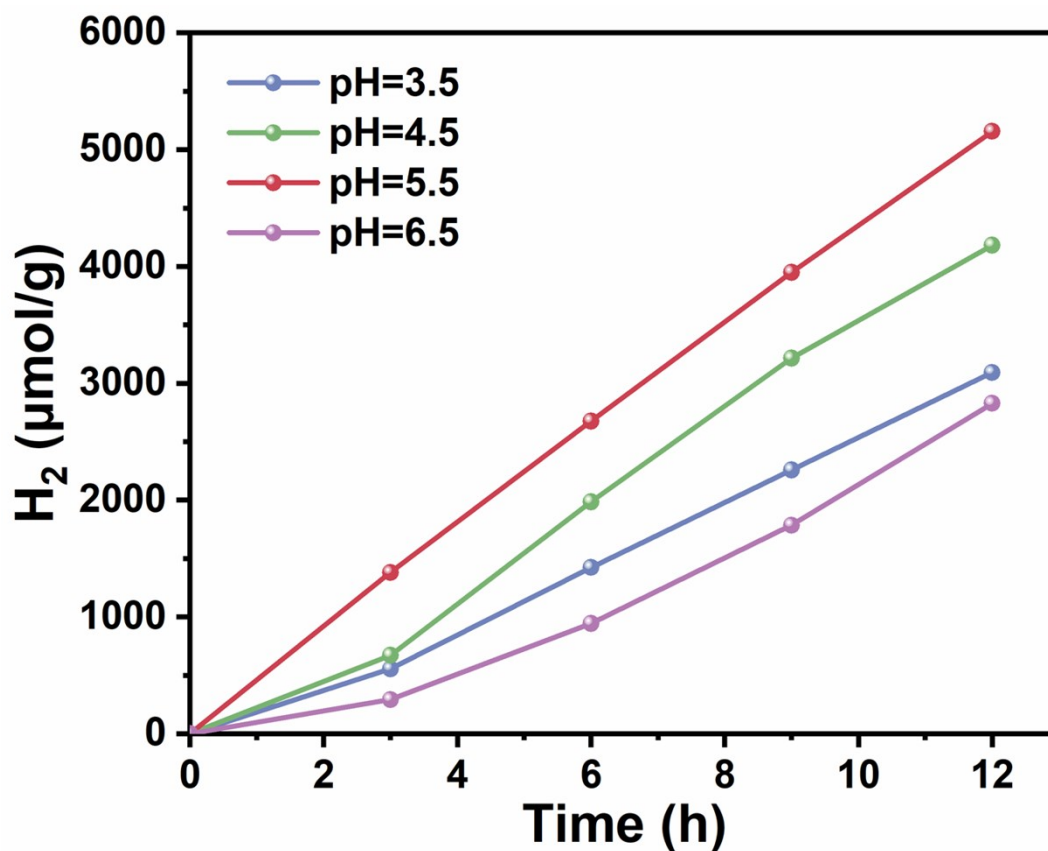

Figure S4. Photocatalytic hydrogen evolution at different pH values. Conditions: 10 mg of 0.34- $P_2W_{18}@NU-1000$ , 1 wt% Pt, 20 mL of 1 M AA aqueous, 300 W Xe-lamp.

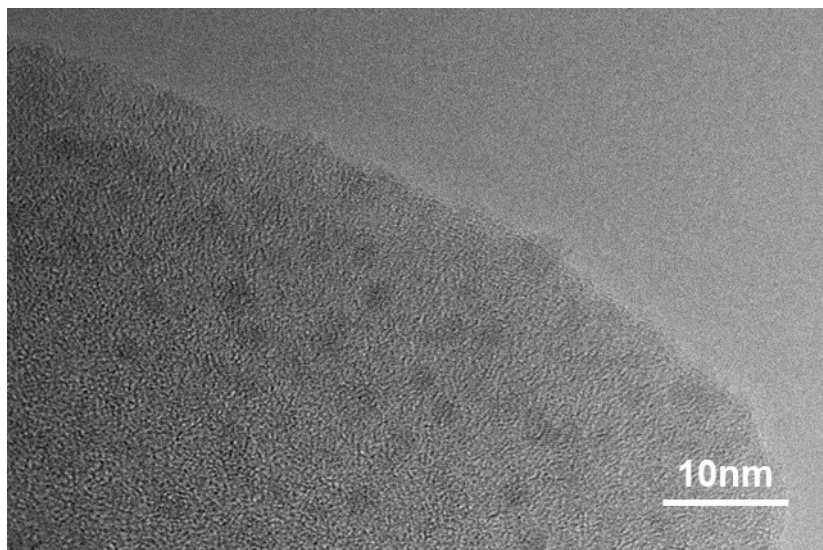

Figure S5. High resolution TEM image of NU-1000-Pt.

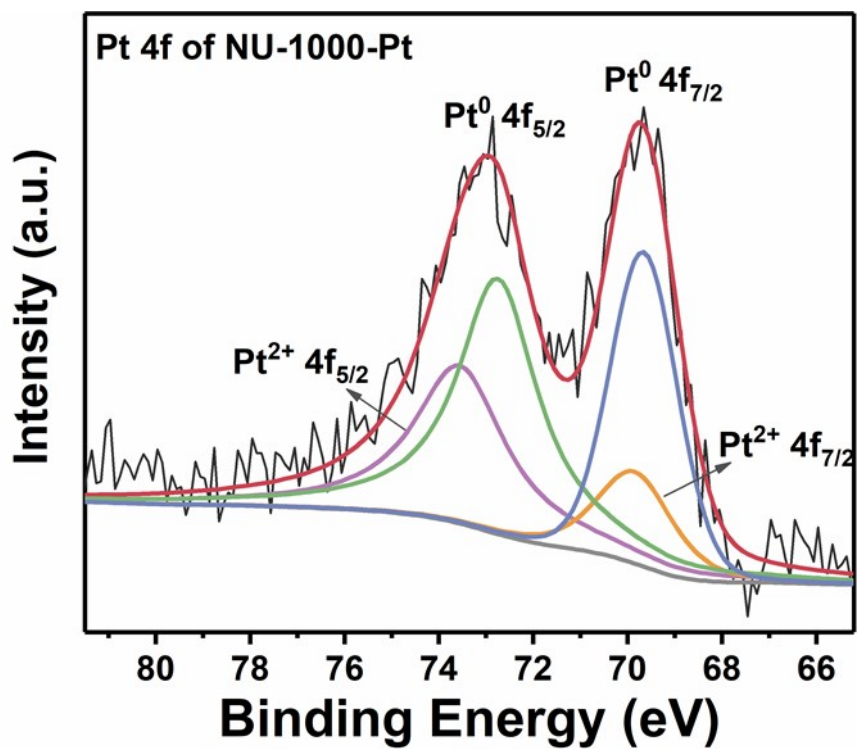

Figure S6. High resolution XPS spectra of Pt 4f in NU-1000-Pt.

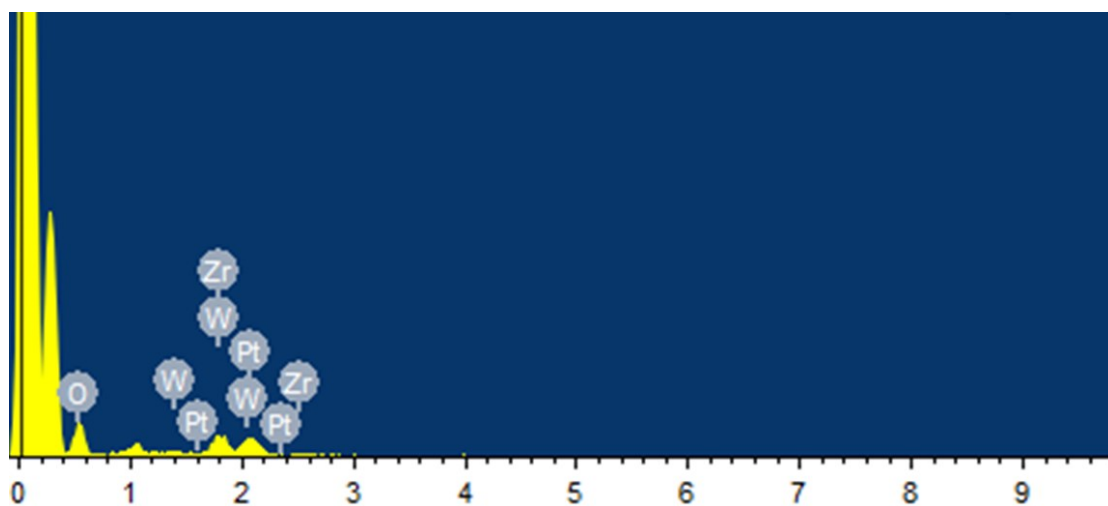

Figure S7. EDS elemental analysis of 0.34- $\text{P}_2\text{W}_{18}$ @NU-1000-Pt.

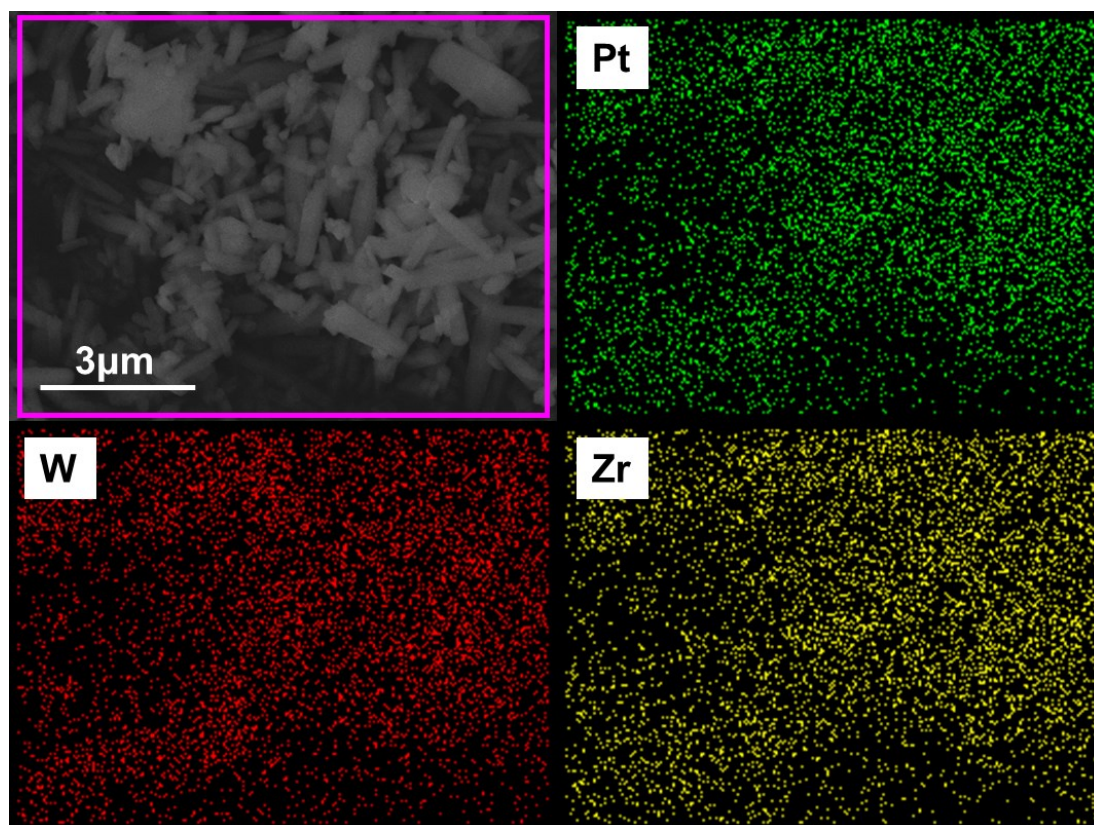

Figure S8. The corresponding elemental mapping images of 0.34- $\text{P}_2\text{W}_{18}$ @NU-1000-Pt.

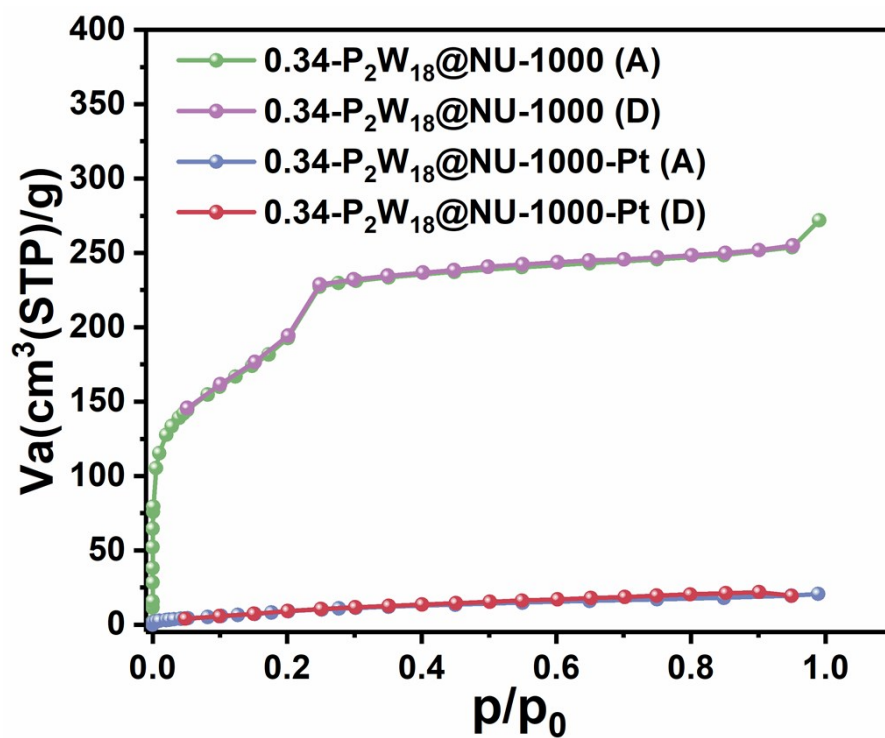

Figure S9. The comparison of low temperature N<sub>2</sub> adsorption-desorption isotherms of 0.34-P<sub>2</sub>W<sub>18</sub>@NU-1000 before and after photocatalysis.

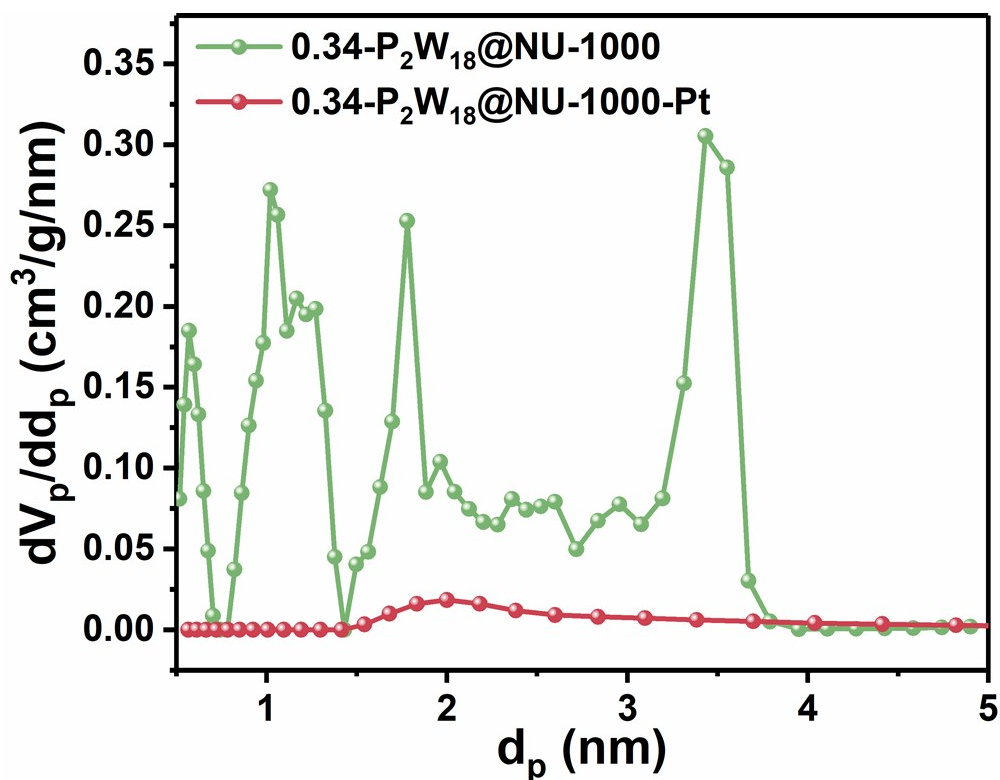

Figure S10. The comparison of the pore distribution curves of 0.34-P<sub>2</sub>W<sub>18</sub>@NU-1000 before and after photocatalysis

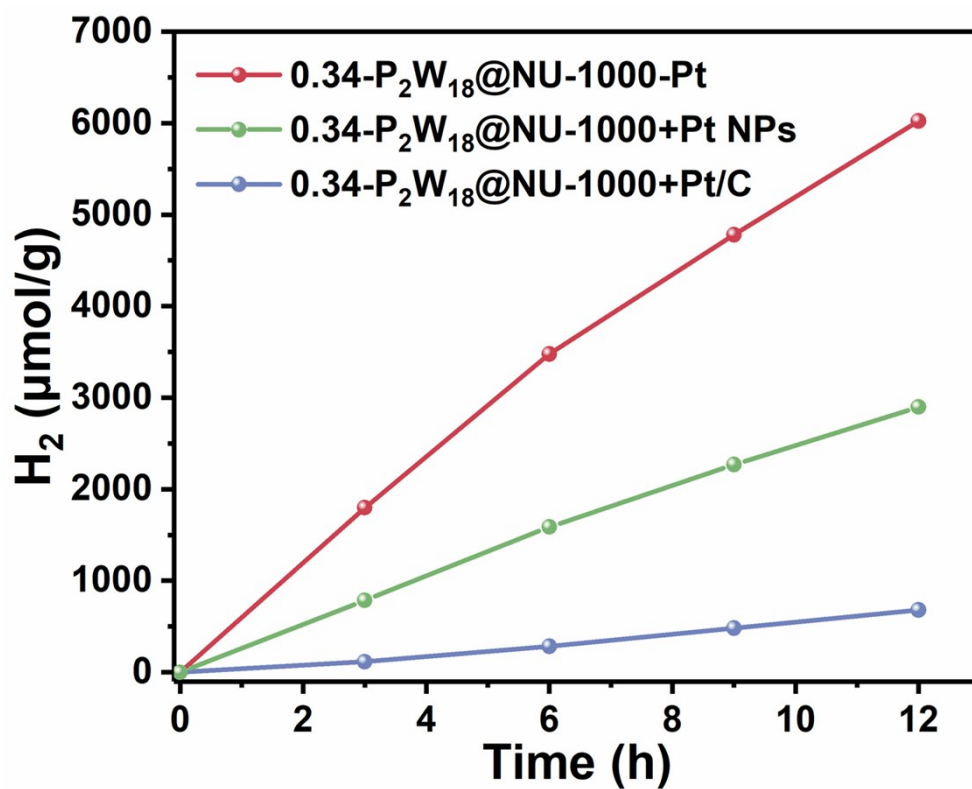

**Figure S11.** Photocatalytic hydrogen evolution of 0.34-P<sub>2</sub>W<sub>18</sub>@NU-1000 with different types of Pt sources which contain equal amount of Pt species.

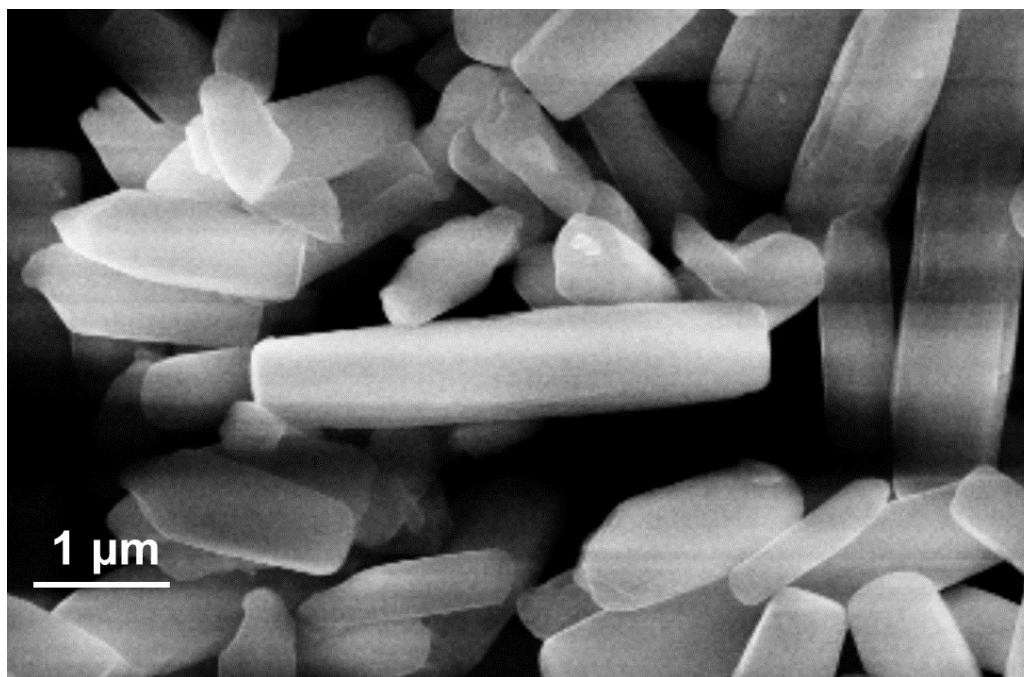

**Figure S12.** SEM image of 0.34-P<sub>2</sub>W<sub>18</sub>@NU-1000 after photocatalytic hydrogen evolution for 12 h.



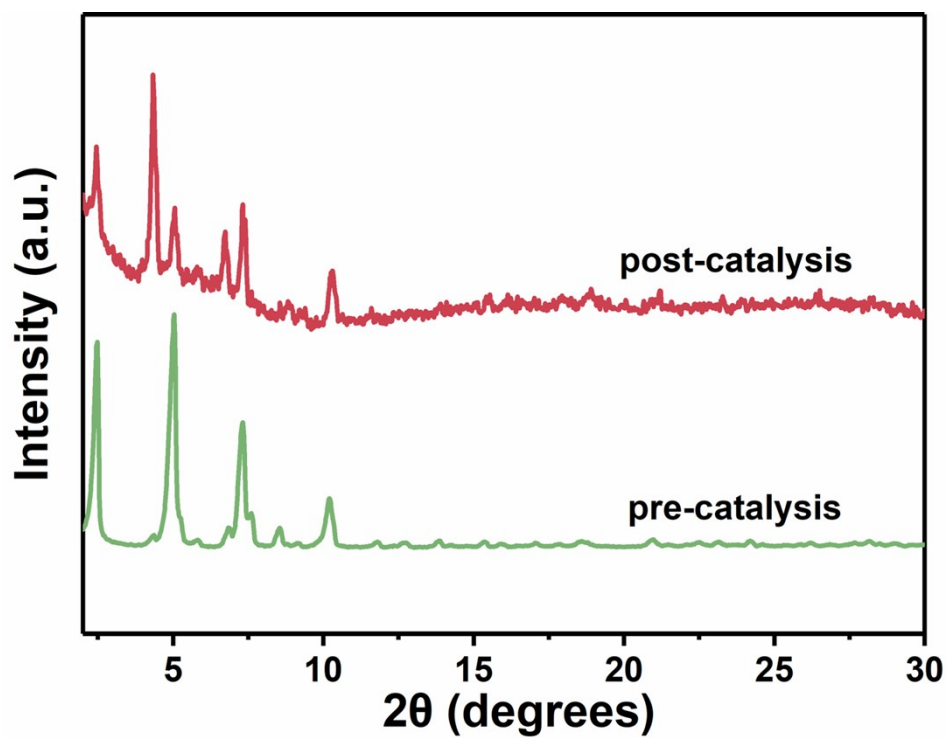

**Figure S13.** PXRD patterns of 0.34- $P_2W_{18}@NU-1000$  before and after photocatalytic reaction for 12 h.

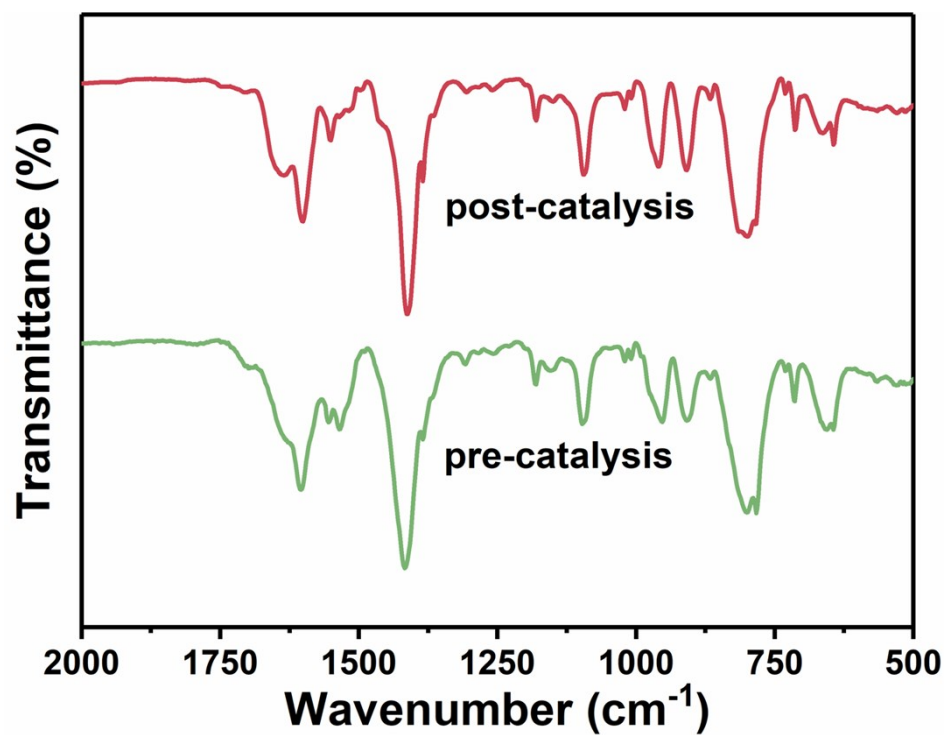

**Figure S14.** FT-IR spectra of 0.34- $P_2W_{18}@NU-1000$  before and after photocatalysis for 12 h.

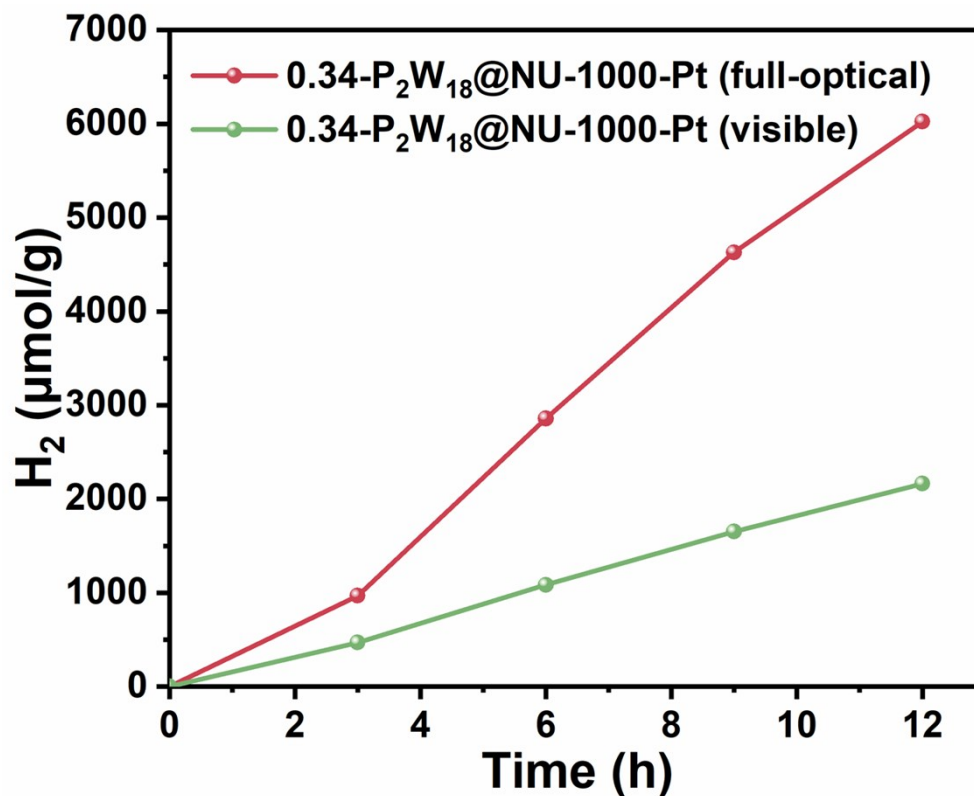

**Figure S15.** Photocatalytic hydrogen under different light sources. Reaction conditions: 10 mg of 0.34-P<sub>2</sub>W<sub>18</sub>@NU-1000, 0.25 wt% Pt, pH=5.5, 20 mL of 1 M AA aqueous, 300 W Xe-lamp.

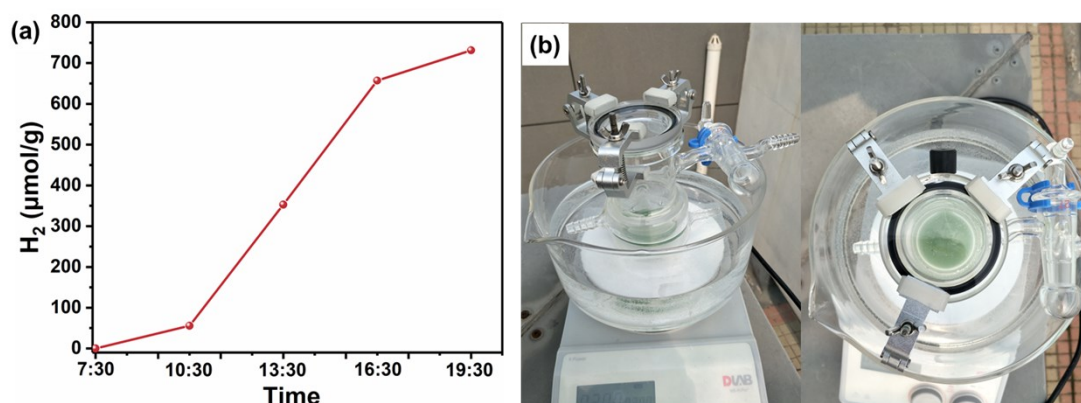

**Figure S16.** (a) Photocatalytic hydrogen evolution of 0.34-P<sub>2</sub>W<sub>18</sub>@NU-1000 under Natural Sunlight. Weather conditions (obtained from the website of China National Meteorological Observatory <http://www.weather.com.cn>): Beijing, China; N 39°43'29'', E 116°9'51''; ASL 130 m; July 15<sup>th</sup>, 2019; 34 °C/24 °C, Cloudy; Visibility: 4 km; UV intensity level (at noon): 7. Experiment conditions: 10 mg 0.34-P<sub>2</sub>W<sub>18</sub>@NU-1000 catalyst, 0.25 wt% Pt, 20 ml of 1 M AA aqueous at pH 5.5. (b) Photos of equipment for photocatalytic hydrogen evolution under Natural Sunlight.

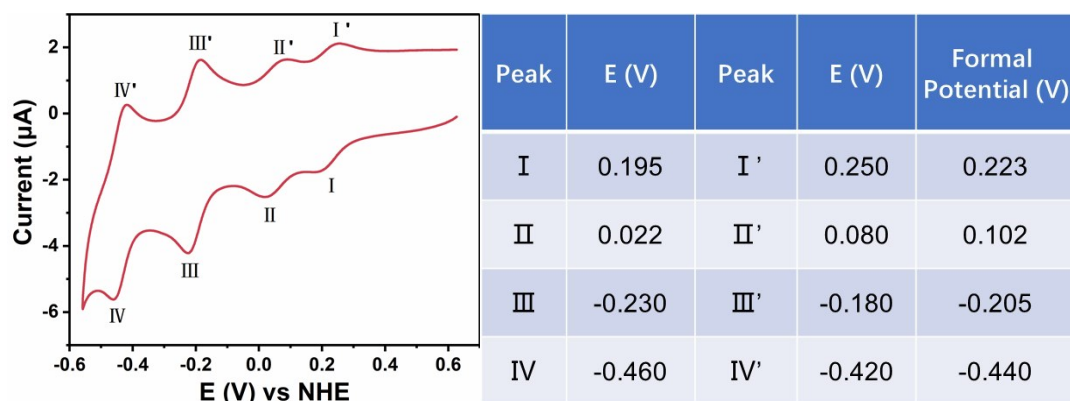

**Figure S17.** Left: Cyclic voltammogram of  $\text{P}_2\text{W}_{18}$  ( $10^{-4}$  M) in 0.1 M  $\text{H}_2\text{SO}_4$  aqueous solution using glassy carbon working electrode, saturated calomel electrode (SCE) reference electrode, and Pt wire auxiliary electrode; Right: the corresponding peak potentials and calculated formal potentials for different redox couples. Scan rate: 50 mV/s. The measured potential was expressed by converting to normal hydrogen electrode (NHE).

## 2. Table S1-S2

**Table S1.** Comparison of different photocatalytic systems for hydrogen production using POM@MOF composites. TON is defined as  $n(1/2 \text{H}_2)/n(\text{catalyst})$ .

| Catalyst                                     | Photosensitizer                  | Solvent                                              | Time  | TON  | Ref.      |
|----------------------------------------------|----------------------------------|------------------------------------------------------|-------|------|-----------|
| $\text{P}_2\text{W}_{18}$ @NU-1000-Pt        | —                                | $\text{H}_2\text{O}$                                 | 120 h | 5464 | This work |
| <b>PNPMOF</b>                                | —                                | $\text{H}_2\text{O}$                                 | 6 h   | 64   | 1         |
| $\text{Ni}_4\text{P}_2\text{W}_{18}$ @MOF-1  | —                                | $\text{H}_2\text{O}/\text{MeOH}$                     | 72 h  | 1476 | 2         |
| $\text{P}_2\text{W}_{15}\text{V}_3$ @MIL-101 | $[\text{Ru}(\text{bpy})_3]^{2+}$ | $\text{DMF}/\text{H}_2\text{O}/\text{CH}_3\text{CN}$ | 8 h   | 56   | 3         |
| WD-POM@SMOF-1                                | $[\text{Ru}(\text{bpy})_3]^{2+}$ | $\text{H}_2\text{O}/\text{MeOH}$                     | 12 h  | 392  | 4         |
| $\text{P}_2\text{W}_{18}$ @UiO               | —                                | $\text{DMF}/\text{CH}_3\text{CN}$                    | 14 h  | 307  | 5         |

**Table S2.** PL decay (at 505 nm) lifetimes of NU-1000, 0.34- $\text{P}_2\text{W}_{18}$ @NU-1000 samples upon excitation at 365 nm, the PL decays were corrected by IRF.

| Compounds                                                | $\tau_1$ (ns) | $\tau_2$ (ns) | $\tau_3$ (ns) |
|----------------------------------------------------------|---------------|---------------|---------------|
| <b>NU-1000</b>                                           | 0.76          | 3.89          | 15.17         |
| <b>0.34-<math>\text{P}_2\text{W}_{18}</math>@NU-1000</b> | 0.53          | 3.01          | 13.23         |

### 3. Apparent quantum yield calculation

$$n_{\text{photons}} = \frac{Pt\lambda}{hcN_A} = 7.136 \times 10^{-3} \text{ mol} \quad (1)$$

$$\phi = \frac{2 \times n_{H_2}}{n_{\text{photons}}} = 1.69\% \quad (2)$$

Where P is the illumination power ( $P=EA_R$ ,  $E=2.6 \text{ mW/cm}^2$ ),  $A_R$  is the irradiation area ( $\pi R^2$ ,  $R=2.1 \text{ cm}$ ), t is the illumination time (s, in our cases  $t=43200 \text{ s}$ ), equivalent wavelength  $\lambda=549 \text{ nm}$  for full optical Xe-lamp, h is the Planck constant, c is the velocity of light and  $N_A$  is Avogadro's number.

### 4. References

1. W. Guo, H. Lv, Z. Chen, K. P. Sullivan, S. M. Lauinger, Y. Chi, J. M. Sumliner, T. Lian and C. L. Hill, *J. Mater. Chem. A*, 2016, **4**, 5952-5957.
2. X. J. Kong, Z. Lin, Z. M. Zhang, T. Zhang and W. Lin, *Angew. Chem. Int. Ed.*, 2016, **55**, 6411-6416.
3. H. Li, S. Yao, H.-L. Wu, J.-Y. Qu, Z.-M. Zhang, T.-B. Lu, W. Lin and E.-B. Wang, *Appl. Catal. B: Environ.*, 2018, **224**, 46-52.
4. J. Tian, Z. Y. Xu, D. W. Zhang, H. Wang, S. H. Xie, D. W. Xu, Y. H. Ren, H. Wang, Y. Liu and Z. T. Li, *Nat. Commun.*, 2016, **7**, 11580.
5. Z. M. Zhang, T. Zhang, C. Wang, Z. Lin, L. S. Long and W. Lin, *J. Am. Chem. Soc.*, 2015, **137**, 3197-3200.
